# Supplementary material for: Mining TCGA Data Using Boolean Implications
Source: PubMed Central journal article supplement (PMC4108374; doi:10.1371/journal.pone.0102119), 2014-07-23
Supplement: pone.0102119.s021.pdf [file pone.0102119.s021.pdf]

## Mutual Exclusion Relations in the Genomic Alterations Sub-network

HIL0 implications represent mutual exclusions and could indicate alternate hits on the same pathway. In our results (details are in Table S7), there was evidence for this possibility. Table 1 summarizes all the cases where the mutual exclusion relationships were between genes on pathways curated by the TCGA [1]. While many mutual exclusion relationships were between genes on the same pathway or closely coupled

| Alteration 1 | Alteration 2 | Possible Biological Significance                        |
|--------------|--------------|---------------------------------------------------------|
| 7p11.2-amp   | 11p15.5-del  | EGFR and HRAS; RAS signalling                           |
| 12q15-amp    | TP53_mut     | MDM2 and TP53; TP53 signalling                          |
| 19q12-amp    | 13q14.2-del  | CCNE1 and RB1; RB signalling                            |
| 9p21.3-del   | RB1_mut      | CDKN2A/CDKN2B and RB1; RB signalling                    |
| ERBB2_M_mut  | 10q23.31-del | ERBB2 and PTEN; RAS and PI3K class 1 pathway            |
| 19q12-amp    | TP53_mut     | CCNE1 and TP53; RB signalling and P53 pathway           |
| 12q14.1-amp  | PTEN_mut     | CDK4 and PTEN; RB signalling and PI3K class1 signalling |
| 13q14.2-del  | EGFR_mut     | RB1 and EGFR; RB signalling and RAS signalling          |

**Table 1.** Mapping the HIL0 implications in the GBM data set to known signalling pathways.

pathways (such as PI3K class 1 and RAS pathways or P53 and RB signalling pathways), there were mutual exclusion relationships between genes on different pathways (last two rows of Table 1). This pattern of mutual exclusion may highlight uncharacterized disease progression subgroups. Our graph also reveals mutual exclusion between IDH1 mutations and 7p11.2 amplifications and 10q23.31 deletions. These relations are probably subtype-specific occurrences since IDH1 mutations are associated with the G-CIMP group within the Proneural subtype and 7p11.2 (EGFR) amplifications and 10q23.31 (PTEN) deletions were associated with the Classical subtype [2]. As far as we know, this relationship has not been uncovered before. Some of these relationships may not have been identified earlier because of incomplete pathway information. This demonstrates the value of our unbiased method that does not depend on a priori information about pathways.

## References

1. McLendon R, Friedman A, Bigner D, Van Meir E, Brat D, et al. (2008) Comprehensive genomic characterization defines human glioblastoma genes and core pathways. *Nature* 455: 1061-1068.
2. Verhaak R, Hoadley K, Purdom E, Wang V, Qi Y, et al. (2010) Integrated genomic analysis identifies clinically relevant subtypes of glioblastoma characterized by abnormalities in *pdgfra*, *idh1*, *egfr*, and *nfl*. *Cancer Cell* 17(1): 98-110.
